Correction

# Correction: Spiegelzymes® Mirror-Image Hammerhead Ribozymes and Mirror-Image DNAzymes, an Alternative to siRNAs and microRNAs to Cleave mRNAs *In Vivo*?

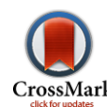

The PLOS ONE Staff

There are errors in Figure S1 and Figure S2. The authors have provided corrected figures here.

## Supporting Information

**Figure S1 Heterochiral D/L-RNA-duplex showing either right- or left-handedness.** The duplex shown consists of the short sequences D-(5'-CGCCA-3') and L-(5'-UGGCG-3') and the base moieties are paired in a canonical Watson-Crick manner. The D-RNA strands are always shown in red, whereas the L-RNA strands are shown in blue. Interestingly, due to the heterochirality of the base pairs, D/L-duplexes can show either right- (A) or left-handedness (B). **A.** The D/L-RNA duplex shown in its right-handed, anti-parallel conformation. The D-RNA strand (red) is in a natural A-RNA form configuration, whereas the nucleotides of the mirror-image L-RNA strand (blue) show ribose rings, which are rotated about the N-glycosidic bonds, which connect the bases with their ribose rings. This arrangement of the nucleotides leads to a smaller minor groove and a larger major groove of the duplex. One can say that the D-RNA strand has forced its natural (right-)handedness upon the L-RNA strand. Only for comparison reasons: The transparent red D-RNA strand shown arranged together with the opaque red D-RNA strand would form a natural, right-handed D/D-RNA duplex in A-RNA form. The atom positions of the base moieties of the natural D/D-duplex and that of the D/L-RNA duplex are identical. **B.** The same D/L-RNA duplex, but now shown in its left-handed, anti-parallel conformation. The L-RNA strand (blue) is in its preferred left-handed A-form configuration, whereas the nucleotides of the natural D-RNA strand (red) show ribose rings which are rotated about the N-glycosidic bonds connecting their bases. In this case, one can say that the L-RNA strand, for which the natural handedness is left-handed, has forced its handedness upon the D-RNA strand. For comparison reasons: The transparent blue L-RNA-strand shown arranged together with the opaque blue L-RNA strand would form a conventional, left-handed L/L-RNA duplex.

(TIF)

**Figure S2 The detailed view of ribonucleotide conformations in homochiral and heterochiral complexes.** The natural nucleotides are shown in red, whereas the mirror-image nucleotides are shown in blue: **A.** Comparison between the natural D/D-base pair (above) and the right-handed conformation of the D/L-base pair (below). **B.** Superimposition of the D/D-with the D/L-base pair. **C.** Diagonal side-view of the D/D-base pair superimposed with the D/L-base pair. As one can see, the D-ribose ring and the L-ribose ring show a common symmetry plane as soon as the necessary ribose ring rotation has taken place.

(TIF)

## Reference

1. Wyszko E, Mueller F, Gabrylska M, Bondzio A, Popenda M, et al. (2014) Spiegelzymes® Mirror-Image Hammerhead Ribozymes and Mirror-Image DNAzymes, an Alternative to siRNAs and microRNAs to Cleave mRNAs *In Vivo*? PLoS ONE 9(1): e86673. doi:10.1371/journal.pone.0086673

**Citation:** The PLOS ONE Staff (2014) Correction: Spiegelzymes® Mirror-Image Hammerhead Ribozymes and Mirror-Image DNAzymes, an Alternative to siRNAs and microRNAs to Cleave mRNAs *In Vivo*? PLoS ONE 9(3): e93798. doi:10.1371/journal.pone.0093798

**Published:** March 31, 2014

**Copyright:** © 2014 The PLOS ONE Staff. This is an open-access article distributed under the terms of the Creative Commons Attribution License, which permits unrestricted use, distribution, and reproduction in any medium, provided the original author and source are credited.
